# Supplementary material
Source: PubMed Central journal article supplement (PMC2566133)
Supplement: supp_46_10_3338__1.pdf [file supp_46_10_3338__1.pdf]

## Cross-tabulation of marker genotypes

The tables below show cross-tabulations of the numbers of cases classified into transmission chains according to IS6110 and each of the MIRU-VNTR combinations, allowing for evolution by single events in either marker.

| IS6110-<br>RFLP<br>genotypes<br>GD=1 | 12-MIRU genotypes (GD=1) |   |   | Total |
|--------------------------------------|--------------------------|---|---|-------|
|                                      | 1                        | 2 | 3 |       |
| 1                                    | 219                      | 1 |   | 220   |
| 2                                    | 1                        |   |   | 1     |
| 3                                    | 1                        |   |   | 1     |
| 4                                    | 1                        |   |   | 1     |
| 5                                    | 4                        |   |   | 4     |
| 6                                    | 33                       |   |   | 33    |
| 7                                    | 1                        |   |   | 1     |
| 8                                    | 9                        |   |   | 9     |
| 9                                    | 8                        |   |   | 8     |
| 10                                   | 1                        |   |   | 1     |
| 11                                   | 1                        |   |   | 1     |
| 12                                   | 1                        |   |   | 1     |
| 13                                   | 1                        |   |   | 1     |
| 14                                   | 1                        |   |   | 1     |
| 15                                   | 2                        |   |   | 2     |
| 16                                   | 1                        |   |   | 1     |
| 17                                   | 2                        |   |   | 2     |
| 18                                   | 1                        |   |   | 1     |
| 19                                   | 3                        |   |   | 3     |
| 20                                   | 1                        |   |   | 1     |
| 21                                   | 4                        |   | 1 | 5     |
| 22                                   | 1                        |   |   | 1     |
| 23                                   | 1                        |   |   | 1     |
| 24                                   | 1                        |   |   | 1     |
| 25                                   | 1                        |   |   | 1     |
| 26                                   | 1                        |   |   | 1     |
| 27                                   | 2                        |   |   | 2     |
| 28                                   | 2                        |   |   | 2     |
| 29                                   | 1                        |   |   | 1     |
| 30                                   | 1                        |   |   | 1     |
| 31                                   | 2                        |   |   | 2     |
| 32                                   | 1                        |   |   | 1     |
| 33                                   | 2                        |   |   | 2     |
| 34                                   | 1                        |   |   | 1     |
| 35                                   | 1                        |   |   | 1     |
| 36                                   | 1                        |   |   | 1     |
| 37                                   | 1                        |   |   | 1     |
| 38                                   | 1                        |   |   | 1     |
| 39                                   | 1                        |   |   | 1     |
| 40                                   | 1                        |   |   | 1     |
| Total                                | 319                      | 1 | 1 | 321   |

| IS6110-<br>RFLP<br>genotypes<br>GD=1 | 12-MIRU + ETR A, B, C (GD=1) |   |   |   | Total |
|--------------------------------------|------------------------------|---|---|---|-------|
|                                      | 1                            | 2 | 3 | 4 |       |
| 1                                    | 219                          |   | 1 |   | 220   |
| 2                                    | 1                            |   |   |   | 1     |
| 3                                    | 1                            |   |   |   | 1     |
| 4                                    | 1                            |   |   |   | 1     |
| 5                                    | 4                            |   |   |   | 4     |
| 6                                    | 33                           |   |   |   | 33    |
| 7                                    | 1                            |   |   |   | 1     |
| 8                                    | 9                            |   |   |   | 9     |
| 9                                    | 8                            |   |   |   | 8     |
| 10                                   | 1                            |   |   |   | 1     |
| 11                                   | 1                            |   |   |   | 1     |
| 12                                   | 1                            |   |   |   | 1     |
| 13                                   | 1                            |   |   |   | 1     |
| 14                                   | 1                            |   |   |   | 1     |
| 15                                   | 2                            |   |   |   | 2     |
| 16                                   | 1                            |   |   |   | 1     |
| 17                                   | 2                            |   |   |   | 2     |
| 18                                   | 1                            |   |   |   | 1     |
| 19                                   | 3                            |   |   |   | 3     |
| 20                                   | 1                            |   |   |   | 1     |
| 21                                   | 4                            |   |   | 1 | 5     |
| 22                                   | 1                            |   |   |   | 1     |
| 23                                   | 1                            |   |   |   | 1     |
| 24                                   | 1                            |   |   |   | 1     |
| 25                                   | 1                            |   |   |   | 1     |
| 26                                   | 1                            |   |   |   | 1     |
| 27                                   | 2                            |   |   |   | 2     |
| 28                                   | 2                            |   |   |   | 2     |
| 29                                   | 1                            |   |   |   | 1     |
| 30                                   |                              | 1 |   |   | 1     |
| 31                                   | 2                            |   |   |   | 2     |
| 32                                   | 1                            |   |   |   | 1     |
| 33                                   | 2                            |   |   |   | 2     |
| 34                                   | 1                            |   |   |   | 1     |
| 35                                   | 1                            |   |   |   | 1     |
| 36                                   | 1                            |   |   |   | 1     |
| 37                                   | 1                            |   |   |   | 1     |
| 38                                   | 1                            |   |   |   | 1     |
| 39                                   | 1                            |   |   |   | 1     |
| 40                                   | 1                            |   |   |   | 1     |
| Total                                | 318                          | 1 | 1 | 1 | 321   |



| IS6110-<br>RFLP<br>genotypes<br>GD=1 | 15-MIRU-VNTR (GD-1) |     |   |   |   |   |   |   |   |    |    | Total |     |
|--------------------------------------|---------------------|-----|---|---|---|---|---|---|---|----|----|-------|-----|
|                                      | 1                   | 2   | 3 | 4 | 5 | 6 | 7 | 8 | 9 | 10 | 11 |       |     |
| 1                                    |                     | 219 |   |   |   |   |   |   |   | 1  |    |       | 220 |
| 2                                    |                     | 1   |   |   |   |   |   |   |   |    |    |       | 1   |
| 3                                    | 1                   |     |   |   |   |   |   |   |   |    |    |       | 1   |
| 4                                    | 1                   |     |   |   |   |   |   |   |   |    |    |       | 1   |
| 5                                    |                     | 4   |   |   |   |   |   |   |   |    |    |       | 4   |
| 6                                    | 33                  |     |   |   |   |   |   |   |   |    |    |       | 33  |
| 7                                    | 1                   |     |   |   |   |   |   |   |   |    |    |       | 1   |
| 8                                    | 9                   |     |   |   |   |   |   |   |   |    |    |       | 9   |
| 9                                    | 8                   |     |   |   |   |   |   |   |   |    |    |       | 8   |
| 10                                   | 1                   |     |   |   |   |   |   |   |   |    |    |       | 1   |
| 11                                   | 1                   |     |   |   |   |   |   |   |   |    |    |       | 1   |
| 12                                   | 1                   |     |   |   |   |   |   |   |   |    |    |       | 1   |
| 13                                   | 1                   |     |   |   |   |   |   |   |   |    |    |       | 1   |
| 14                                   | 1                   |     |   |   |   |   |   |   |   |    |    |       | 1   |
| 15                                   | 2                   |     |   |   |   |   |   |   |   |    |    |       | 2   |
| 16                                   | 1                   |     |   |   |   |   |   |   |   |    |    |       | 1   |
| 17                                   | 2                   |     |   |   |   |   |   |   |   |    |    |       | 2   |
| 18                                   | 1                   |     |   |   |   |   |   |   |   |    |    |       | 1   |
| 19                                   | 3                   |     |   |   |   |   |   |   |   |    |    |       | 3   |
| 20                                   | 1                   |     |   |   |   |   |   |   |   |    |    |       | 1   |
| 21                                   | 4                   |     |   |   |   |   |   |   |   |    |    | 1     | 5   |
| 22                                   |                     |     |   |   |   |   |   |   | 1 |    |    |       | 1   |
| 23                                   |                     | 1   |   |   |   |   |   |   |   |    |    |       | 1   |
| 24                                   | 1                   |     |   |   |   |   |   |   |   |    |    |       | 1   |
| 25                                   |                     |     |   |   | 1 |   |   |   |   |    |    |       | 1   |
| 26                                   |                     |     |   |   |   | 1 |   |   |   |    |    |       | 1   |
| 27                                   |                     |     |   |   |   |   | 2 |   |   |    |    |       | 2   |
| 28                                   |                     |     |   |   |   |   |   | 2 |   |    |    |       | 2   |
| 29                                   |                     | 1   |   |   |   |   |   |   |   |    |    |       | 1   |
| 30                                   |                     |     |   | 1 |   |   |   |   |   |    |    |       | 1   |
| 31                                   |                     |     | 2 |   |   |   |   |   |   |    |    |       | 2   |
| 32                                   |                     | 1   |   |   |   |   |   |   |   |    |    |       | 1   |
| 33                                   |                     | 2   |   |   |   |   |   |   |   |    |    |       | 2   |
| 34                                   | 1                   |     |   |   |   |   |   |   |   |    |    |       | 1   |
| 35                                   | 1                   |     |   |   |   |   |   |   |   |    |    |       | 1   |
| 36                                   |                     | 1   |   |   |   |   |   |   |   |    |    |       | 1   |
| 37                                   | 1                   |     |   |   |   |   |   |   |   |    |    |       | 1   |
| 38                                   |                     | 1   |   |   |   |   |   |   |   |    |    |       | 1   |
| 39                                   |                     | 1   |   |   |   |   |   |   |   |    |    |       | 1   |
| 40                                   | 1                   |     |   |   |   |   |   |   |   |    |    |       | 1   |
| Total                                | 77                  | 232 | 2 | 1 | 1 | 1 | 2 | 2 | 1 | 1  | 1  |       | 321 |



| IS6110-<br>RFLP<br>genotypes<br>GD=1 | 24-MIRU-VNTR (GD=1) |     |   |   |   |   |   |   |   |    |    |    |    |    |    | Total |
|--------------------------------------|---------------------|-----|---|---|---|---|---|---|---|----|----|----|----|----|----|-------|
|                                      | 1                   | 2   | 3 | 4 | 5 | 6 | 7 | 8 | 9 | 10 | 11 | 12 | 13 | 14 | 15 |       |
| 1                                    |                     | 219 |   |   |   |   |   |   |   |    |    |    |    | 1  |    | 220   |
| 2                                    |                     | 1   |   |   |   |   |   |   |   |    |    |    |    |    |    | 1     |
| 3                                    | 1                   |     |   |   |   |   |   |   |   |    |    |    |    |    |    | 1     |
| 4                                    | 1                   |     |   |   |   |   |   |   |   |    |    |    |    |    |    | 1     |
| 5                                    |                     | 4   |   |   |   |   |   |   |   |    |    |    |    |    |    | 4     |
| 6                                    | 33                  |     |   |   |   |   |   |   |   |    |    |    |    |    |    | 33    |
| 7                                    | 1                   |     |   |   |   |   |   |   |   |    |    |    |    |    |    | 1     |
| 8                                    | 9                   |     |   |   |   |   |   |   |   |    |    |    |    |    |    | 9     |
| 9                                    | 8                   |     |   |   |   |   |   |   |   |    |    |    |    |    |    | 8     |
| 10                                   |                     |     |   |   |   |   |   | 1 |   |    |    |    |    |    |    | 1     |
| 11                                   | 1                   |     |   |   |   |   |   |   |   |    |    |    |    |    |    | 1     |
| 12                                   | 1                   |     |   |   |   |   |   |   |   |    |    |    |    |    |    | 1     |
| 13                                   | 1                   |     |   |   |   |   |   |   |   |    |    |    |    |    |    | 1     |
| 14                                   |                     |     |   |   |   | 1 |   |   |   |    |    |    |    |    |    | 1     |
| 15                                   |                     |     |   |   |   |   | 2 |   |   |    |    |    |    |    |    | 2     |
| 16                                   | 1                   |     |   |   |   |   |   |   |   |    |    |    |    |    |    | 1     |
| 17                                   | 2                   |     |   |   |   |   |   |   |   |    |    |    |    |    |    | 2     |
| 18                                   | 1                   |     |   |   |   |   |   |   |   |    |    |    |    |    |    | 1     |
| 19                                   | 3                   |     |   |   |   |   |   |   |   |    |    |    |    |    |    | 3     |
| 20                                   |                     |     |   |   |   |   |   | 1 |   |    |    |    |    |    |    | 1     |
| 21                                   |                     |     |   |   |   |   |   |   | 4 |    |    |    |    |    | 1  | 5     |
| 22                                   |                     |     |   |   |   |   |   |   |   |    |    |    | 1  |    |    | 1     |
| 23                                   |                     | 1   |   |   |   |   |   |   |   |    |    |    |    |    |    | 1     |
| 24                                   | 1                   |     |   |   |   |   |   |   |   |    |    |    |    |    |    | 1     |
| 25                                   |                     |     |   |   |   | 1 |   |   |   |    |    |    |    |    |    | 1     |
| 26                                   |                     |     |   |   |   |   |   |   |   | 1  |    |    |    |    |    | 1     |
| 27                                   |                     |     |   |   |   |   |   |   |   |    | 2  |    |    |    |    | 2     |
| 28                                   |                     |     |   |   |   |   |   |   |   |    |    | 2  |    |    |    | 2     |
| 29                                   |                     | 1   |   |   |   |   |   |   |   |    |    |    |    |    |    | 1     |
| 30                                   |                     |     |   | 1 |   |   |   |   |   |    |    |    |    |    |    | 1     |
| 31                                   |                     |     | 2 |   |   |   |   |   |   |    |    |    |    |    |    | 2     |
| 32                                   |                     | 1   |   |   |   |   |   |   |   |    |    |    |    |    |    | 1     |
| 33                                   |                     | 2   |   |   |   |   |   |   |   |    |    |    |    |    |    | 2     |
| 34                                   | 1                   |     |   |   |   |   |   |   |   |    |    |    |    |    |    | 1     |
| 35                                   | 1                   |     |   |   |   |   |   |   |   |    |    |    |    |    |    | 1     |
| 36                                   |                     | 1   |   |   |   |   |   |   |   |    |    |    |    |    |    | 1     |
| 37                                   | 1                   |     |   |   |   |   |   |   |   |    |    |    |    |    |    | 1     |
| 38                                   |                     | 1   |   |   |   |   |   |   |   |    |    |    |    |    |    | 1     |
| 39                                   |                     | 1   |   |   |   |   |   |   |   |    |    |    |    |    |    | 1     |
| 40                                   |                     |     |   |   | 1 |   |   |   |   |    |    |    |    |    |    | 1     |
| Total                                | 67                  | 232 | 2 | 1 | 1 | 1 | 1 | 4 | 4 | 1  | 2  | 2  | 1  | 1  | 1  | 321   |
